# Supplementary material for: Christiangramia qingdaonensis sp. nov., a novel polysaccharide-degrading Bacteroidota bacterium, isolated from intertidal sediment
Source: Research Square preprint supplement (doi:10.21203/rs.3.rs-8043186/v1), 2025-11-26
Supplement: Supplementary file 1 [file ce819fd5dfb1db4207a4b69f.docx]

Supplementary materials for：

***Christiangramia qingdaonensis* sp. nov., a novel polysaccharide-degrading *Bacteroidota* bacterium, isolated from intertidal sediment**

Zhao-Tong Chen, Bing Yu, Yu-Shan Li, Zhi-Wei Zhu, Xi-Ying Zhang*, Yi Li*

College of Life Sciences, Shanxi Agricultural University, Taigu 030801, PR China

State Key Laboratory of Microbial Technology, Marine Biotechnology Research Center, Shandong University, Qingdao 266237, PR China

**Running title:** *Christiangramia qingdaonensis* sp. nov.

**Subject category:** New taxa of *Bacteroidota*

***Correspondence:**

Yi Li

College of Life Sciences, Shanxi Agricultural University, Taigu 030801, China;

Tel: 86-354-6286908; Fax: 86-354-6286908; E-mail: liyi@sxau.edu.cn

Xi-Ying Zhang

State Key Laboratory of Microbial Technology, Marine Biotechnology Research Center, Shandong University, Qingdao 266237, PR China

E-mail: zhangxiying@sdu.edu.cn

The GenBank accession numbers for the 16S rRNA gene sequence and the genome sequence of strain ASW11-125T arePV134465 and NZ_JBLWIM000000000, respectively.


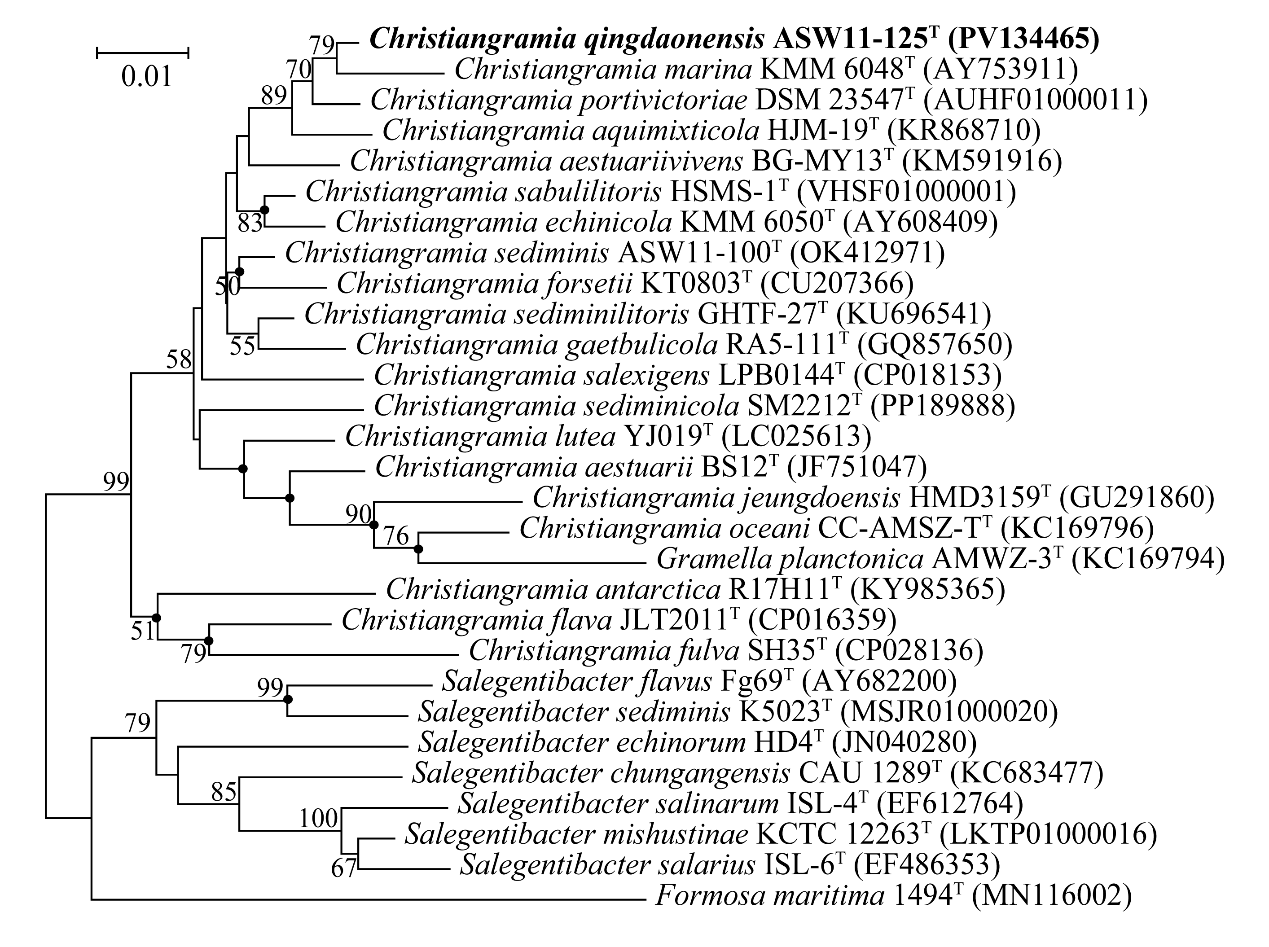


**Fig. S1** Neighbor-joining phylogenetic tree based on the 16S rRNA gene sequences, showing the phylogenetic positions of strain ASW11-125T (in bold) and the phylogenetically related species. Bootstrap values (> 50%) based on 1000 replicates are shown at nodes. Filled circles indicate branches that were also recovered in maximum-likelihood tree and the minimum-evolution tree. Bar, 0.01 substitutions per nucleotide position


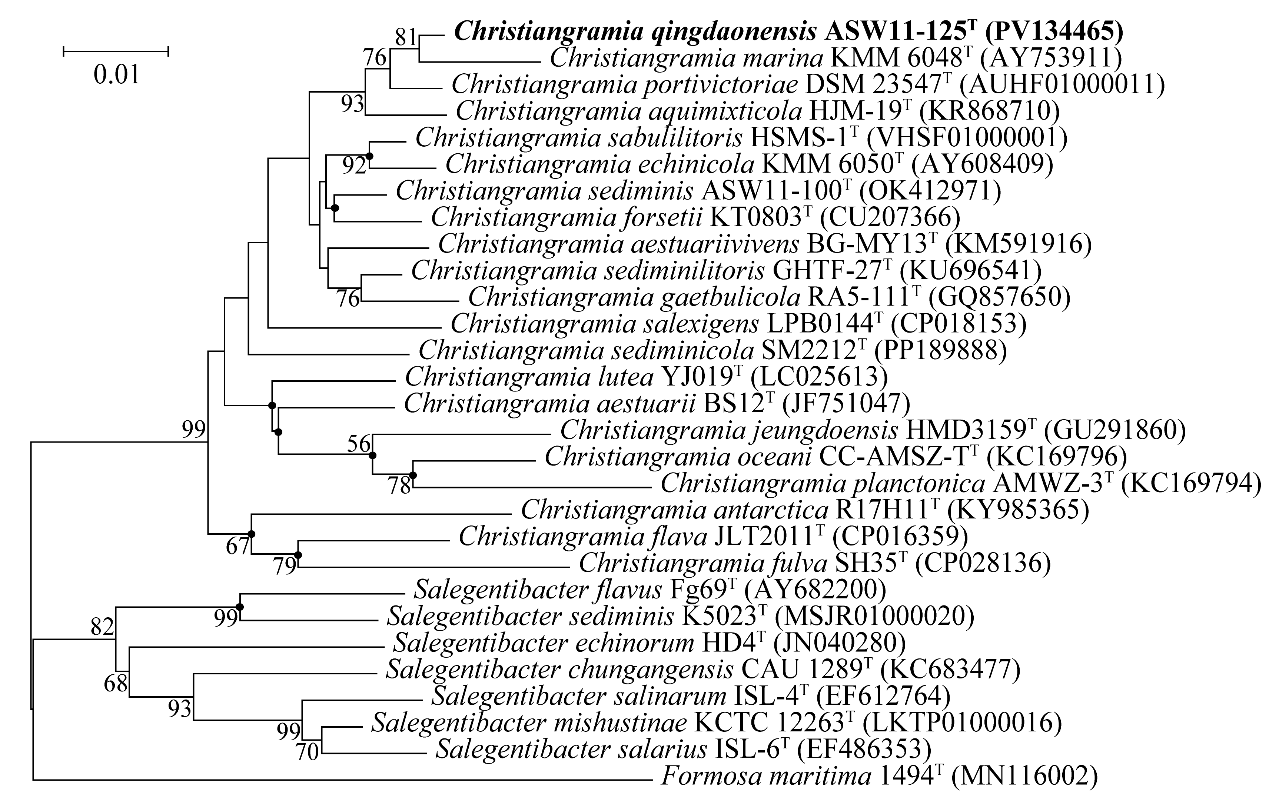


**Fig. S2** Minimum-evolution phylogenetic tree based on 16S rRNA gene sequences showing the phylogenetic positions of strain ASW11-125T (in bold) and the phylogenetically related species. Bootstrap values (> 50%) based on 1000 replicates are shown at nodes. Filled circles indicate branches that were also recovered in maximum- likelihood tree and neighbor-joining tree. Bar, 0.01 substitutions per nucleotide position


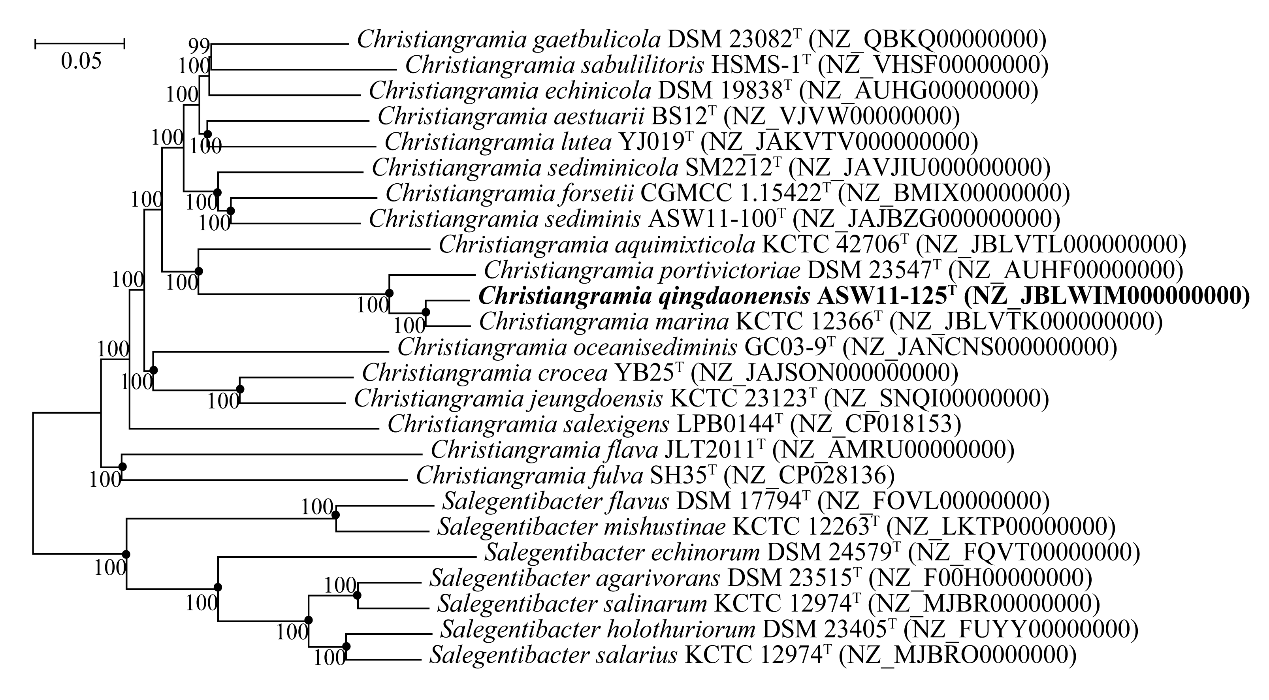


**Fig. S3** Neighbor-joining phylogenetic trees based on 1542 OCs sequences showing relationships between strain ASW11-125T (in bold) and the phylogenetically related species. Filled circles indicate branches that were also recovered in maximum-likelihood tree and minimum-evolution tree. Bar, 0.05 substitutions per amino acid position


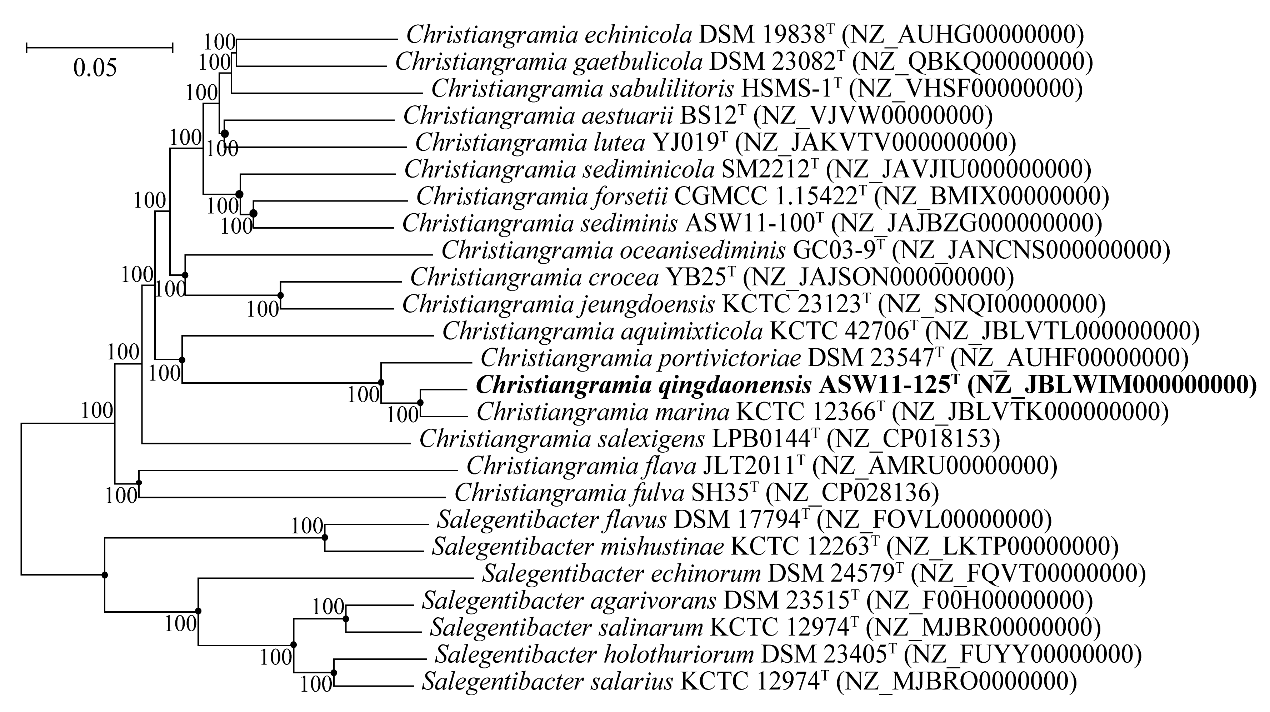


**Fig. S4** Minimum-evolution phylogenetic trees based on 1542 OCs sequences showing relationships between strain ASW11-125T (in bold) and the phylogenetically related species. Filled circles indicate branches that were also recovered in neighbor-joining tree and maximum-likelihood tree. Bar, 0.05 the number of changes over the whole sequence


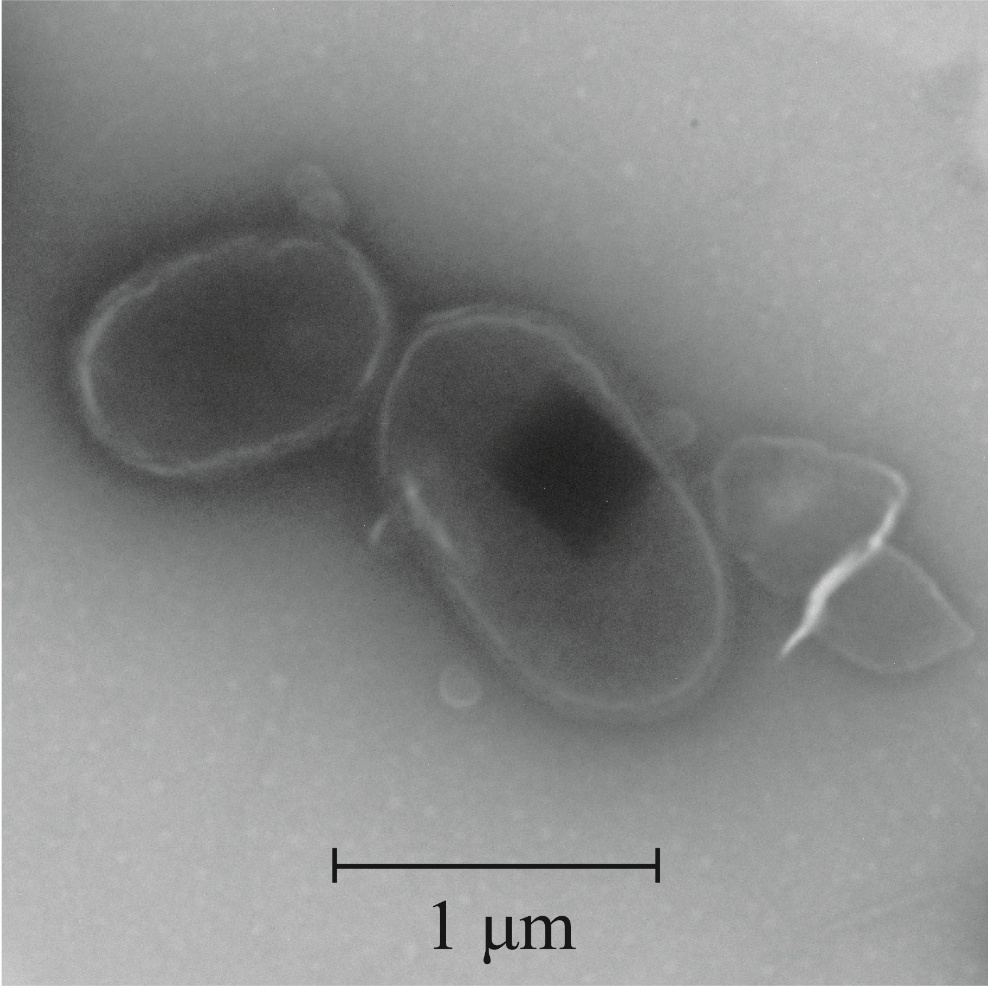


**Fig. S5** Transmission electron microscopy image of novel isolate strain ASW11-125T cultured in MA at 28 ℃ for 48 h


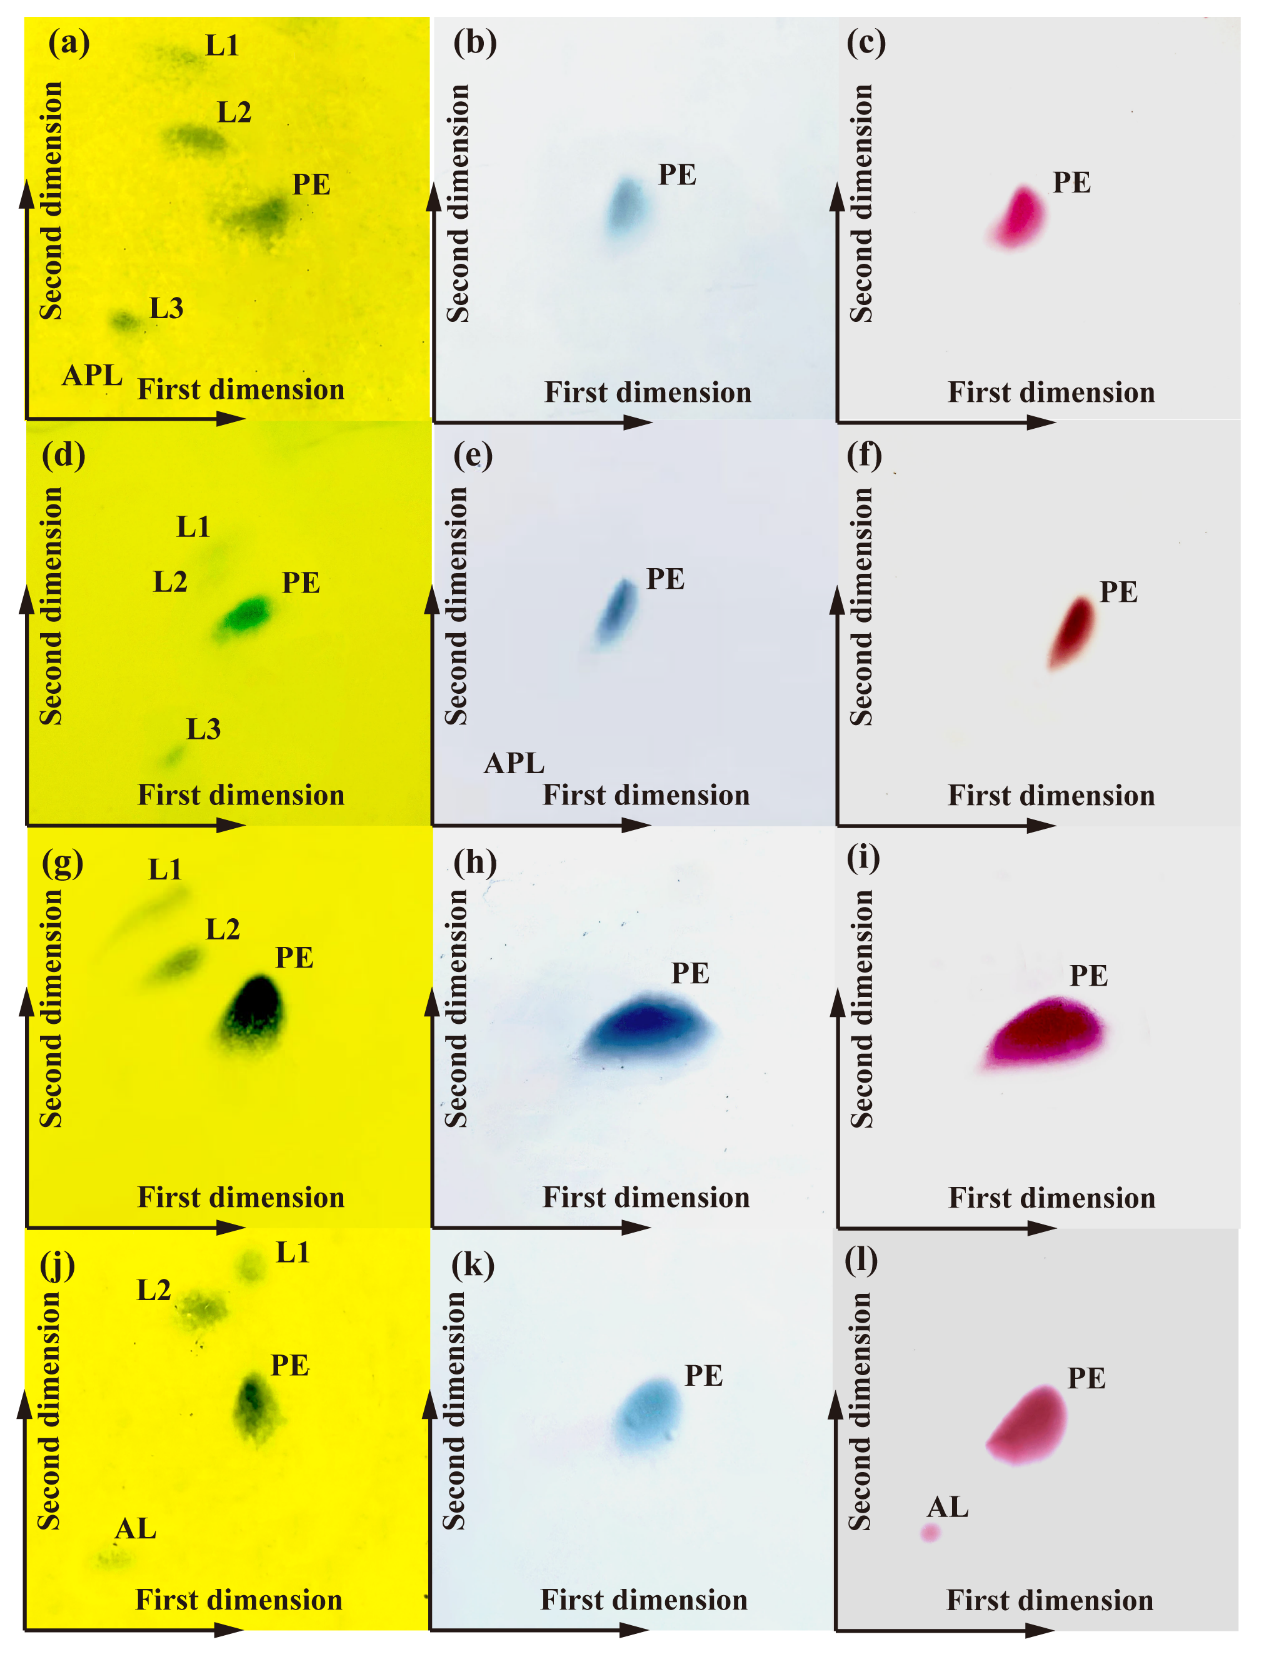


**Fig. S6** Two-dimensional TLC plate images of lipids of *C. qingdaonensis* ASW11-125T (a–c), *C. portivictoriae* MCCC 1A00585T (d–f), *C. aquimixticola* KCTC 42706T (g–i) and *C. marina* KCTC 12366T (j–l), which were respectively stained with molybdatophosphoric acid (a, d, g and j), phosphorusmolybdenum Blue (b, e, h and k), and ninhydrin (c, f, i and l). PE, Phosphatidylethanolamine; AL, Aminolipid; L1, unknown lipid; L2, unknown lipid; L3, unknown lipid

**Table S1** 16S rDNA, average nucleotide identity (ANI) and digital DNA-DNA hybridization (dDDH) values for strain ASW11-125T and other *Christiangramia* species

| NO | Strains | 16S rDNA | ANI | dDDH |
| --- | --- | --- | --- | --- |
| 1 | *Christiangramia portivictoriae* DSM 23547T (NZ_AUHF00000000) | 98.8 | 85.2 | 28.7 |
| 2 | *Christiangramia aquimixticola* KCTC 42706T (NZ_JBLVTL000000000) | 98.8 | 74.6 | 18.6 |
| 3 | *Christiangramia marina* KCTC 12366T (NZ_JBLVTK000000000) | 98.6 | 91.5 | 44.3 |
| 4 | *Christiangramia sabulilitoris* HSMS-1T (NZ_VHSF00000000) | 98.3 | 74.2 | 18.4 |
| 5 | *Christiangramia sediminis* ASW11-100T (NZ_JAJBZG000000000) | 98.1 | 75.1 | 18.6 |
| 6 | *Christiangramia echinicola* DSM 19838T (NZ_AUHG00000000) | 97.8 | 75.0 | 18.7 |
| 7 | *Christiangramia forsetii* CGMCC 1.15422T (NZ_BMIX00000000) | 97.5 | 75.0 | 18.7 |
| 8 | *Christiangramia lutea* YJ019T (NZ_JAKVTV000000000) | 97.5 | 74.4 | 18.5 |
| 9 | *Christiangramia gaetbulicola* DSM 23082T (NZ_QBKQ00000000) | 97.1 | 75.3 | 19.5 |
| 10 | *Christiangramia sediminicola* SM2212T (NZ_JAVJIU000000000) | 97.0 | 75.2 | 18.4 |
| 11 | *Christiangramia crocea* YB25T (NZ_JAJSON000000000) | 96.9 | 73.6 | 17.9 |
| 12 | *Christiangramia aestuarii* BS12T (NZ_VJVW00000000) | 96.7 | 73.6 | 18.2 |
| 13 | *Christiangramia salexigens* LPB0144T (NZ_CP018153) | 96.4 | 73.5 | 17.9 |
| 14 | *Christiangramia flava* JLT2011T (NZ_AMRU00000000) | 95.9 | 71.8 | 17.3 |
| 15 | *Christiangramia jeungdoensis* KCTC 23123T (NZ_SNQI00000000) | 94.9 | 68.2 | 16.7 |
| 16 | *Christiangramia oceanisediminis* GC03-9T (NZ_JANCNS000000000) | 94.4 | 73.2 | 17.8 |
| 17 | *Christiangramia fulva* SH35T (NZ_CP028136) | 93.9 | 72.0 | 17.0 |

**Table S2** Genome statistics of strain ASW11-125T and the closely related species

| **Genomic characteristic** | **1** | | **2** | | **3** | **4** | **5** | | **6** | |
| --- | --- | --- | --- | --- | --- | --- | --- | --- | --- | --- |
| Size (Mbp) | 3.2 | 3.3 | | 3.3 | | 3.3 | | 3.5 | | 3.2 | |
| Number of Genes (total) | 3010 | 3103 | | 3029 | | 2987 | | 3207 | | 2920 | |
| Number of proteins | 2981 | 3025 | | 2964 | | 2874 | | 3147 | | 2864 | |
| Pseudogene | 6 | 53 | | 14 | | 90 | | 10 | | 4 | |
| Genes with RAST  (Percentages) | 949  (31.5%) | 996  (32.1%) | | 976  (32.2%) | | 961  (32.2%) | | 978  (30.5%) | | 945  (32.4%) | |
| G+C content (%) | 38.3 | 40.0 | | 39.9 | | 48.0 | | 39.6 | | 39.2 | |
| rRNA | 3 | 3 | | 6 | | 4 | | 6 | | 7 | |
| tRNA | 16 | 18 | | 41 | | 15 | | 40 | | 41 | |
| Other RNA | 4 | 4 | | 4 | | 4 | | 4 | | 4 | |

Strains: 1, *C. qingdaonensis* ASW11-125T; 2, *C. marina* KCTC 12366T; 3, *C. portivictoriae* DSM 23547T; 4, *C. aquimixticola* KCTC 42706T; 5, *C. echinicola* DSM 19838T; 6, *C. sabulilitoris* HSMS-1T.

**Table S3** The RAST results of strain ASW11-125T and the closely related species

| Categories | 1 | | 2 | | 3 | | 4 | | 5 | | 6 | |
| --- | --- | --- | --- | --- | --- | --- | --- | --- | --- | --- | --- | --- |
|  | Value | age% | Value | age% | Value | age% | Value | age% | Value | age% | Value | age% |
| Amino acids and derivatives | 203 | 21.4 | 203 | 20.4 | 198 | 20.3 | 194 | 20.2 | 201 | 20.6 | 192 | 20.3 |
| Cofactors, vitamins, prosthetic groups, pigments | 144 | 15.2 | 144 | 14.5 | 143 | 14.7 | 142 | 14.8 | 144 | 14.7 | 141 | 14.9 |
| Protein metabolism | 109 | 11.5 | 112 | 11.2 | 124 | 12.7 | 112 | 11.7 | 110 | 11.2 | 111 | 11.7 |
| Carbohydrates | 86 | 9.1 | 92 | 9.2 | 83 | 8.5 | 81 | 8.4 | 94 | 9.6 | 83 | 8.8 |
| Nucleosides and nucleotides | 68 | 7.2 | 68 | 6.8 | 69 | 7.1 | 72 | 7.5 | 65 | 6.6 | 67 | 7.1 |
| DNA metabolism | 54 | 5.7 | 68 | 6.8 | 63 | 6.5 | 65 | 6.8 | 70 | 7.2 | 57 | 6.0 |
| Cell wall and capsule | 36 | 3.8 | 55 | 5.5 | 29 | 3.0 | 53 | 5.5 | 30 | 3.1 | 33 | 3.5 |
| RNA metabolism | 36 | 3.8 | 36 | 3.6 | 37 | 3.8 | 36 | 3.7 | 38 | 3.9 | 35 | 3.7 |
| Membrane transport | 35 | 3.7 | 33 | 3.3 | 40 | 4.1 | 32 | 3.3 | 38 | 3.9 | 37 | 3.9 |
| Respiration | 25 | 2.6 | 27 | 2.7 | 23 | 2.4 | 24 | 2.5 | 29 | 3.0 | 26 | 2.8 |
| Fatty acids, lipids, and isoprenoids | 24 | 2.5 | 24 | 2.4 | 29 | 3.0 | 24 | 2.5 | 23 | 2.4 | 23 | 2.4 |
| Virulence, disease and defense | 23 | 2.4 | 28 | 2.8 | 30 | 3.1 | 24 | 2.5 | 29 | 3.0 | 25 | 2.6 |
| Stress response | 21 | 2.2 | 21 | 2.1 | 21 | 2.2 | 20 | 2.1 | 22 | 2.2 | 20 | 2.1 |
| Phosphorus metabolism | 17 | 1.8 | 17 | 1.7 | 19 | 1.9 | 17 | 1.8 | 19 | 1.9 | 16 | 1.7 |
| Miscellaneous | 15 | 1.6 | 15 | 1.5 | 15 | 1.5 | 15 | 1.6 | 16 | 1.6 | 17 | 1.8 |
| Potassium metabolism | 12 | 1.3 | 13 | 1.3 | 9 | 0.9 | 12 | 1.2 | 10 | 1.0 | 12 | 1.3 |
| Sulfur metabolism | 9 | 0.9 | 9 | 0.9 | 8 | 0.8 | 11 | 1.1 | 9 | 0.9 | 16 | 1.7 |
| Metabolism of aromatic compounds | 9 | 0.9 | 10 | 1.0 | 10 | 1 | 9 | 0.9 | 10 | 1.0 | 10 | 1.1 |
| Nitrogen metabolism | 7 | 0.7 | 7 | 0.7 | 9 | 0.9 | 7 | 0.7 | 7 | 0.7 | 8 | 0.8 |
| Secondary metabolism | 6 | 0.6 | 6 | 0.6 | 7 | 0.7 | 5 | 0.5 | 5 | 0.5 | 5 | 0.5 |
| Regulation and cell signaling | 6 | 0.6 | 4 | 0.4 | 5 | 0.5 | 2 | 0.2 | 5 | 0.5 | 7 | 0.7 |
| Cell division and cell cycle | 3 | 0.3 | 3 | 0.3 | 4 | 0.4 | 3 | 0.3 | 3 | 0.3 | 3 | 0.3 |
| Dormancy and sporulation | 1 | 0.1 | 1 | 0.1 | 1 | 0.1 | 1 | 0.1 | 1 | 0.1 | 1 | 0.1 |

Strains: 1, *C. qingdaonensis* ASW11-125T; 2, *C. marina* KCTC 12366T; 3, *C. portivictoriae* MCCC 1A00585T; 4, *C. aquimixticola* KCTC 42706T; 5, *C. echinicola* DSM 19838T; 6, *C. sabulilitoris* HSMS-1T.

**Table S4** Comparison of CAZyme abundance among *Christiangramia* species

| Strains | No. of genes | No. of CAZymes | Proportion of CAZymes (%) |
| --- | --- | --- | --- |
| *Christiangramia qingdaonensis* ASW11-125T | 3010 | 131 | 4.35 |
| *Christiangramia marina* KCTC 12366T | 3103 | 133 | 4.29 |
| *Christiangramia portivictoriae* DSM 23547T | 3029 | 141 | 4.66 |
| *Christiangramia aquimixticola* KCTC 42706T | 2987 | 118 | 3.95 |
| *Christiangramia sabulilitoris* HSMS-1T | 2920 | 121 | 4.14 |
| *Christiangramia sediminis* ASW11-100T | 3009 | 120 | 3.99 |
| *Christiangramia echinicola* DSM 19838T | 3207 | 152 | 4.74 |
| *Christiangramia forsetii* CGMCC 1.15422T | 3459 | 155 | 4.48 |
| *Christiangramia lutea* YJ019T | 3222 | 143 | 4.44 |
| *Christiangramia gaetbulicola* DSM 23082T | 3291 | 146 | 4.44 |
| *Christiangramia sediminicola* SM2212T | 3129 | 138 | 4.41 |
| *Christiangramia crocea* YB25T | 3446 | 215 | 6.24 |
| *Christiangramia aestuarii* BS12T | 3133 | 134 | 4.28 |
| *Christiangramia salexigens* LPB0144T | 2698 | 118 | 4.37 |
| *Christiangramia flava* JLT2011T | 3583 | 184 | 6.39 |
| *Christiangramia jeungdoensis* KCTC 23123T | 3224 | 211 | 6.54 |
| *Christiangramia oceanisediminis* GC03-9T | 3425 | 174 | 5.08 |
| *Christiangramia fulva* SH35T | 3893 | 243 | 6.24 |
